# Supplementary material for: Predictors of clinical response to extrafine and non-extrafine particle inhaled corticosteroids in smokers and ex-smokers with asthma
Source: Springer Nature journal article supplement (doi:10.1186/s12931-018-0961-2), 2018-12-01

## Additional file 1:

Table S1. Baseline characteristics

|                                                        | Total                | Smokers              | Ex-smokers           |
|--------------------------------------------------------|----------------------|----------------------|----------------------|
|                                                        | n=43                 | n=22                 | n=21                 |
| Male, n (%)                                            | 18 (42)              | 9 (41)               | 9 (43)               |
| Age, years                                             | 44.98 (12.64)        | 39.55 (12.01)        | 50.67 (10.84)        |
| Presence of atopy, n (%)                               | 27 (64)              | 14 (67)              | 13 (62)              |
| Number of packyears*                                   | 16.80 (11.00; 24.00) | 20.00 (11.75; 29.44) | 14.00 (10.00; 23.00) |
| BMI, kg m <sup>-2</sup>                                | 26.54 (5.62)         | 25.83 (6.14)         | 27.27 (5.08)         |
| Waist/hip ratio                                        | 0.91 (0.10)          | 0.88 (0.08)          | 0.93 (0.12)          |
| Blood neutrophils (10 <sup>9</sup> /L)                 | 4.50 (1.73)          | 5.25 (1.71)          | 3.62 (1.32)          |
| Blood eosinophils (10 <sup>9</sup> /L)                 | 0.29 (0.20)          | 0.35 (0.22)          | 0.24 (0.18)          |
| Total IgE, kIU/L*                                      | 107 (23.97; 483.75)  | 138 (20.60; 548.50)  | 89 (22.95; 321.0)    |
| PD <sub>20</sub> adenosine, mg                         | 2.69 (3.41)          | 2.38 (3.25)          | 3.07 (3.66)          |
| FEV <sub>1</sub> , % predicted                         | 83 (14.47)           | 83 (11.98)           | 84 (16.99)           |
| FEV <sub>1</sub> /FVC, %                               | 67 (10.24)           | 70 (10.84)           | 65 (9.31)            |
| FEF <sub>25-75</sub> , % predicted                     | 49 (22.56)           | 52 (22.22)           | 45 (22.87)           |
| TLC, % predicted                                       | 105 (12.22)          | 103 (13.58)          | 107 (10.53)          |
| RV, % predicted                                        | 115 (27.57)          | 113 (28.81)          | 117 (26.81)          |
| RV/TLC, % predicted                                    | 102 (18.96)          | 103 (17.79)          | 102 (20.55)          |
| R <sub>5</sub> -R <sub>20</sub> , kPa sL <sup>-1</sup> | 0.13 (0.13)          | 0.11 (0.13)          | 0.15 (0.13)          |
| X <sub>5</sub> , kPa sL <sup>-1*</sup>                 | -0.14 (-0.21; -0.09) | -0.14 (-0.21; -0.08) | -0.13 (-0.22; -0.10) |
| F <sub>res</sub> , Hz                                  | 17.19 (6.35)         | 16.49 (6.68)         | 17.91 (6.05)         |
| AX, Hz kPa sL <sup>-1*</sup>                           | 0.75 (0.24; 1.82)    | 0.59 (0.19; 1.51)    | 0.94(0.29; 2.07)     |
| LCI at 2.5%                                            | 10.21 (2.06)         | 9.74 (1.72)          | 10.63 (2.28)         |
| S <sub>cond</sub> , L <sup>-1</sup>                    | 0.04 (0.03)          | 0.04 (0.02)          | 0.04 (0.03)          |
| S <sub>acin</sub> , L <sup>-1</sup>                    | 0.17 (0.09)          | 0.14 (0.06)          | 0.20 (0.11)          |

Data are presented as mean with standard deviation (SD), unless stated otherwise:

\*median with interquartile ranges (IQR); BMI: body mass index; PD<sub>20</sub> adenosine:

provocative dose of small particle adenosine causing a 20% drop in FEV<sub>1</sub>; FEV<sub>1</sub>:

forced expiratory volume in 1 second; FVC: forced vital capacity; FEF<sub>25-75</sub>: forced

expiratory flow between 25% and 75% of FVC; TLC: total lung capacity; RV: residual

volume; RV/TLC: the ratio of residual volume to total lung capacity; R<sub>5</sub>-R<sub>20</sub>: the

difference between resistance at 5 Hz and 20 Hz; X<sub>5</sub>: the reactance at 5 Hz; F<sub>res</sub>:

resonance frequency; AX: the area under curve of reactance; LCI: lung clearance

index; S<sub>cond</sub>: ventilation heterogeneity of the conductive airways; and S<sub>acin</sub>: ventilation

heterogeneity of the acinar structures.

Table S2. Baseline values of measurements of small airways dysfunction

|                                                        | Patients with SAD<br>n=18 | Patients without SAD<br>n=25 |
|--------------------------------------------------------|---------------------------|------------------------------|
| FEF <sub>25-75</sub> , % predicted                     | 37 (13.20)                | 58 (23.95)                   |
| RV/TLC, % predicted                                    | 113 (20.89)               | 95 (13.71)                   |
| R <sub>5</sub> -R <sub>20</sub> , kPa sL <sup>-1</sup> | 0.22 (0.14)               | 0.06 (0.07)                  |
| S <sub>acin</sub> , L <sup>-1</sup> *                  | 0.20 (0.07)               | 0.14 (0.09)                  |
| S <sub>cond</sub> , L <sup>-1</sup> *                  | 0.06 (0.03)               | 0.03 (0.01)                  |

Data are presented as mean with standard deviation (SD); SAD: small airways dysfunction; FEF<sub>25-75</sub>: forced expiratory flow between 25% and 75% of forced vital capacity (FVC); RV/TLC: the ratio of residual volume to total lung capacity; R<sub>5</sub>-R<sub>20</sub>: the difference between resistance at 5 Hz and 20 Hz; S<sub>acin</sub>: ventilation heterogeneity of the acinar structures; and S<sub>cond</sub>: ventilation heterogeneity of the conductive airways.

Table S3. Difference in  $\Delta PD_{20}$  adenosine in patients with and without small airways dysfunction after treatment with QVAR, Clenil and Flixotide

| $\Delta PD_{20}$ adenosine | Patients with SAD            |                    | Patients without SAD         |                     | <i>p</i> -value    |
|----------------------------|------------------------------|--------------------|------------------------------|---------------------|--------------------|
|                            | n (%)                        | Median (IQR)       | n (%)                        | Median (IQR)        |                    |
| QVAR (n=41)                | 17 (41)                      | 0.69 (-0.02; 2.07) | 24 (59)                      | 0.82 (0.06; 1.86)   | 0.653 <sup>‡</sup> |
| Clenil (n=41)              | 18 (44)                      | 1.73 (0.80; 2.14)  | 23 (56)                      | -0.00 (-0.75; 1.47) | 0.306 <sup>‡</sup> |
| Flixotide (n=38)           | 17 (45)                      | 0.96 (0.03; 2.58)  | 21 (55)                      | 0.27 (-0.59; 1.86)  | 0.756 <sup>‡</sup> |
| QVAR vs Clenil             | <i>p</i> =0.157 <sup>£</sup> |                    | <i>p</i> =0.305 <sup>£</sup> |                     |                    |
| QVAR vs Flixotide          | <i>p</i> =0.357 <sup>£</sup> |                    | <i>p</i> =0.232 <sup>£</sup> |                     |                    |

Data are presented as number with percentages (%) and median with interquartile ranges (IQR); *p*-values are obtained from <sup>‡</sup>student t-test/ Mann-Whitney test and <sup>£</sup>paired t-test/ Wilcoxon test;  $\Delta PD_{20}$ : the change from baseline to post-treatment in the provocative dose of small particle adenosine causing a 20% drop in forced expiratory volume in 1 second; SAD: small airways dysfunction.

Table S4: Univariate linear regression analysis of baseline variables and change in airway hyperresponsiveness ( $\Delta PD_{20}$ ) in patients treated with QVAR, Clenil and Flixotide.

|                                                        | $\Delta PD_{20}$ QVAR<br>(n=41) |               | $\Delta PD_{20}$ Clenil<br>(n=41) |               | $\Delta PD_{20}$ Flixotide<br>(n=38) |               |
|--------------------------------------------------------|---------------------------------|---------------|-----------------------------------|---------------|--------------------------------------|---------------|
|                                                        | B                               | 95% CI        | B                                 | 95% CI        | B                                    | 95% CI        |
| Age, years                                             | 0.01                            | -0.04; 0.05   | -0.03                             | -0.08; 0.02   | -0.02                                | -0.07; 0.03   |
| Sex, male/ female                                      | 0.45                            | -0.69; 1.59   | 1.17 <sup>#</sup>                 | -0.14; 2.49   | 0.58                                 | -0.70; 1.87   |
| Current smoking, yes/no                                | -0.88                           | -1.99; 0.22   | -1.10 <sup>#</sup>                | -2.41; 0.21   | -0.79                                | -2.06; 0.48   |
| Presence of atopy, yes/no                              | -0.19                           | -1.38; 0.99   | 0.17                              | -1.28; 1.63   | -0.05                                | -1.43; 1.32   |
| Number of packyears                                    | -0.03                           | -0.07; 0.02   | -0.06 <sup>*</sup>                | -0.11; -0.01  | -0.03                                | -0.08; 0.01   |
| BMI, kg/m <sup>2</sup>                                 | -0.08                           | -0.18; 0.02   | -0.04                             | -0.16; 0.08   | -0.12 <sup>*</sup>                   | -0.23; -0.01  |
| Waist/hip ratio                                        | -1.67                           | -7.02; 3.68   | -4.93                             | -11.14; 1.28  | -4.07                                | -9.80; 1.66   |
| Blood neutrophils, 10 <sup>9</sup> /L                  | -0.48 <sup>**</sup>             | -0.78; -0.17  | -0.37 <sup>#</sup>                | -0.77; 0.03   | -0.55 <sup>**</sup>                  | -0.89; -0.22  |
| Blood eosinophils, 10 <sup>9</sup> /L                  | 1.00                            | -1.77; 3.77   | 2.73                              | -0.68; 6.13   | 2.32                                 | -0.89; 5.52   |
| Total IgE, kIU/L                                       | 0.00                            | -0.002; 0.001 | 0.001                             | -0.001; 0.002 | 0.00                                 | -0.002; 0.001 |
| FEV <sub>1</sub> , % predicted                         | 0.06 <sup>**</sup>              | 0.02; 0.09    | 0.06 <sup>*</sup>                 | 0.01; 0.10    | 0.05 <sup>**</sup>                   | 0.01; 0.10    |
| FEV <sub>1</sub> /FVC, %                               | 0.03                            | -0.02; 0.08   | 0.04                              | -0.02; 0.11   | 0.03                                 | -0.03; 0.09   |
| FEF <sub>25-75</sub> , % predicted                     | 0.03 <sup>**</sup>              | 0.01; 0.06    | 0.04 <sup>*</sup>                 | 0.01; 0.06    | 0.03 <sup>*</sup>                    | 0.01; 0.06    |
| TLC, % predicted                                       | 0.03                            | -0.01; 0.08   | 0.04                              | -0.02; 0.09   | 0.01                                 | -0.04; 0.07   |
| RV, % predicted                                        | -0.01                           | -0.03; 0.01   | -0.002                            | -0.03; 0.02   | -0.02                                | -0.04; 0.01   |
| RV/TLC, % predicted                                    | -0.03 <sup>*</sup>              | -0.06; -0.001 | -0.01                             | -0.05; 0.02   | -0.04 <sup>*</sup>                   | -0.07; -0.01  |
| R <sub>5</sub> -R <sub>20</sub> , kPa sL <sup>-1</sup> | -2.67                           | -7.00; 1.66   | -1.86                             | -6.98; 3.27   | -3.50                                | -8.27; 1.28   |
| X <sub>5</sub> , kPa sL <sup>-1</sup>                  | 1.78                            | -1.73; 5.29   | 0.78                              | -3.43; 5.00   | 2.43                                 | -1.43; 6.29   |
| F <sub>res</sub> , Hz                                  | -0.06                           | -0.15; 0.03   | -0.04                             | -0.14; 0.07   | -0.05                                | -0.16; 0.04   |
| AX, Hz kPa sL <sup>-1</sup>                            | -0.15                           | -0.48; 0.18   | -0.11                             | -0.50; 0.28   | -0.20                                | -0.56; 0.16   |
| LCI at 2.5%                                            | -0.43 <sup>*</sup>              | -0.75; -0.11  | -0.19                             | -0.59; 0.21   | -0.46 <sup>*</sup>                   | -0.81; -0.10  |
| S <sub>cond</sub> , L <sup>-1</sup>                    | -17.75                          | -44.25; 8.74  | 15.28                             | -16.77; 47.34 | -7.08                                | -37.71; 23.54 |
| S <sub>acin</sub> , L <sup>-1</sup>                    | -5.36                           | -12.82; 2.10  | -5.67                             | -14.44; 3.10  | -6.13                                | -14.20; 1.94  |

Data are presented as regression coefficients (B) and 95% confidence intervals (CI); \*\* $p < 0.01$ ; \* $p < 0.05$ ; # $p < 0.1$ ;  $\Delta PD_{20}$ : the change from baseline to post-treatment in the provocative dose of small particle adenosine causing a 20% drop in FEV<sub>1</sub>; BMI: body mass index; FEV<sub>1</sub>: forced expiratory volume in 1 second; FVC: forced vital capacity; FEF<sub>25-75</sub>: forced expiratory flow between 25% and 75% of FVC; TLC: total lung capacity; RV: residual volume; RV/TLC: the ratio of residual volume to total lung capacity; R<sub>5</sub>-R<sub>20</sub>: the difference between resistance at 5 Hz and 20 Hz; X<sub>5</sub>: the reactance at 5 Hz; F<sub>res</sub>: resonance frequency; AX: the area under curve of reactance; LCI: lung clearance index; S<sub>cond</sub>: ventilation heterogeneity of the conductive airways; and S<sub>acin</sub>: ventilation heterogeneity of the acinar structures.

## Figure legend

Figure S1. Scatterplots of significant correlations between baseline variables and  $\Delta PD_{20}$  adenosine.  $\Delta PD_{20}$ : the change from baseline to post-treatment in the provocative dose of small particle adenosine causing a 20% drop in forced expiratory volume in 1 second (FEV1). Figure S1:A shows the correlation between age and  $\Delta PD_{20}$  after treatment with Clenil; Figures S1:B-D show the correlation between blood neutrophils and  $\Delta PD_{20}$  after treatment with QVAR, Clenil and Flixotide, respectively; Figures S1:E show the correlation of blood eosinophils and  $\Delta PD_{20}$  after treatment with Flixotide

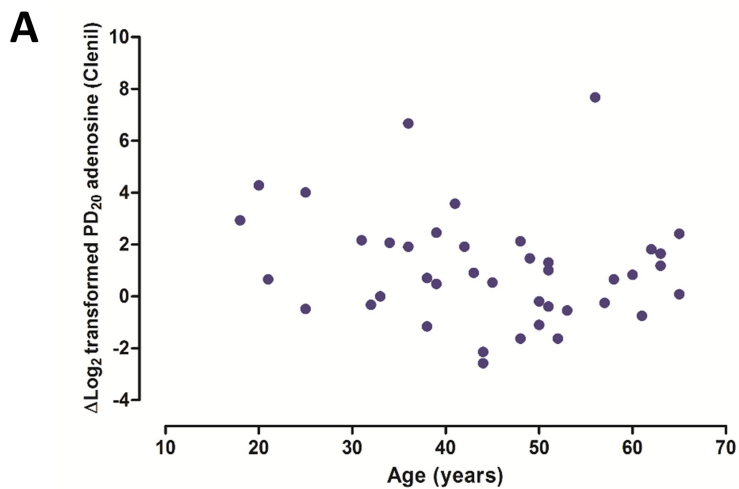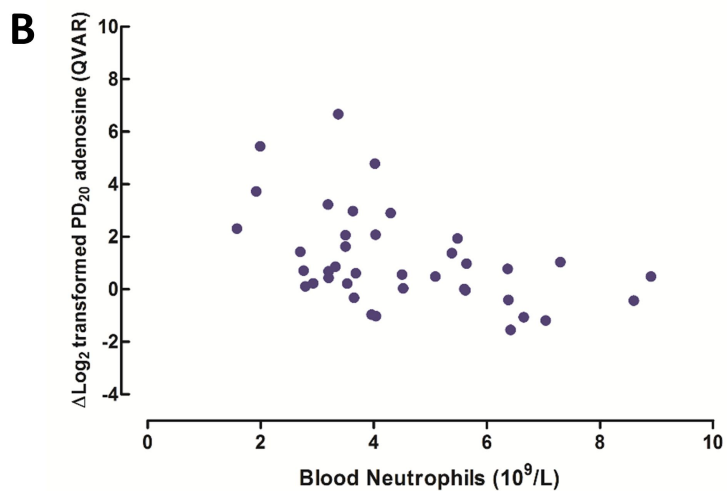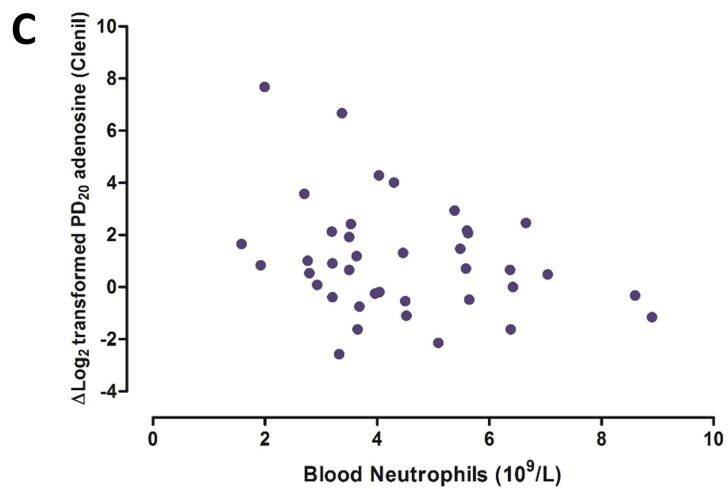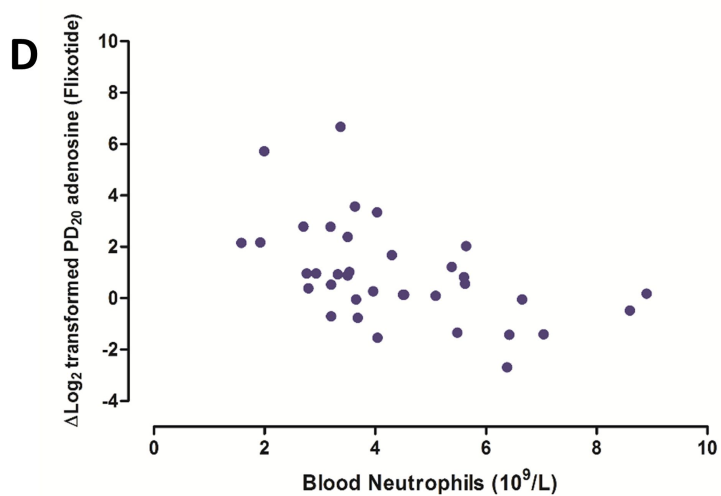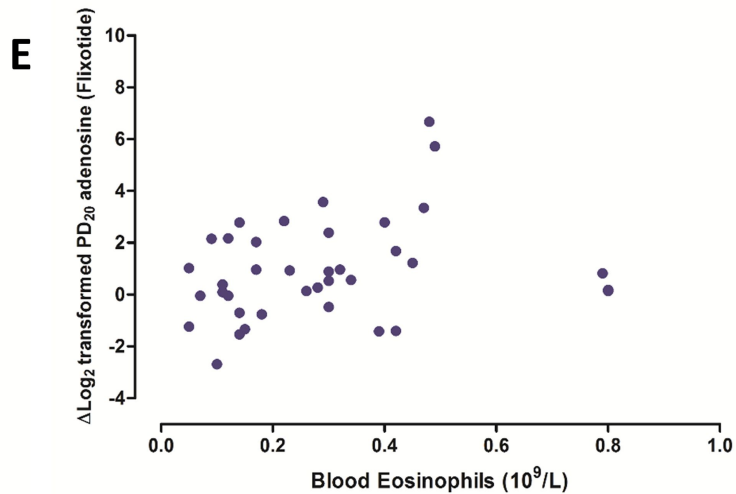

Supplement: MOESM1 [file 16350410]
